# Supplementary material for: Evaluation of a novel nutrition education intervention for medical students from across England
Source: HighWire-hosted journal article supplement (doi:10.1136/bmjopen-2011-000417), 2012-01-01
Supplement: bmjopen-2011-000417-s1.pdf [file bmjopen-2011-000417-s1.pdf]

Research Checklist

21 Sept 2011.

For an article submitted to BMJ Open;

Title; Evaluation of a novel nutrition education intervention for medical students from across England

Our study has no research protocol or checklist. It is a “before and after” study focussing on medical education and clinical nutrition.

Laura Feetham at BMJ advised us to save a document in Word titled “Research Checklist” and attach it to fulfil any ScholarOne website requirement for an attachment.

This exert, shown on page 2 here, may provide information similar to a research checklist.

Thanks for your help.

Regards

Figure 1. Study overview

#### SAMPLING AND RECRUITMENT

- All 23 medical schools in England contacted
- 461 respondents from 15 medical schools
- 100 places offered to 3rd and 4th year medical students
- 98 medical students attended teaching intervention workshops

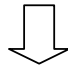

#### INTERVENTION PACKAGE

- Cambridge-based intensive two-day learning intervention workshops delivered to 98 medical students from England over two weekends:
  - 5-6 September 2009 (n= 47)
  - 19-20 September 2009 (n= 51)
- Study tools included:
  - Pre-intervention questionnaire given before the start of a workshop
  - Post-intervention questionnaire used immediately after workshops and again three months later (identical to pre-intervention questionnaire with questions randomised in a different order)

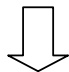

#### FOLLOW UP

- Post-intervention evaluation after 3 months using an online research tool Survey Monkey via e-mailed link to all NNEdPro participants [27]
- Over 300 educationally matched controls identified via British Medical Association Medical Students Committee Listserver to compare baseline KAP with that of the intervention group [28]
